# Supplementary material
Source: MDPI journal article supplement (https://www.mdpi.com/search?q=molbank-2023-M1557)
Supplement: s001 [file molbank-2023-M1557-s001.pdf]

1H NMR of 3-Bromo-4-phenylisothiazole-5-carboxylic acid (12)

AK1074

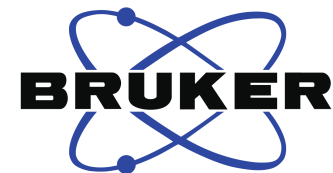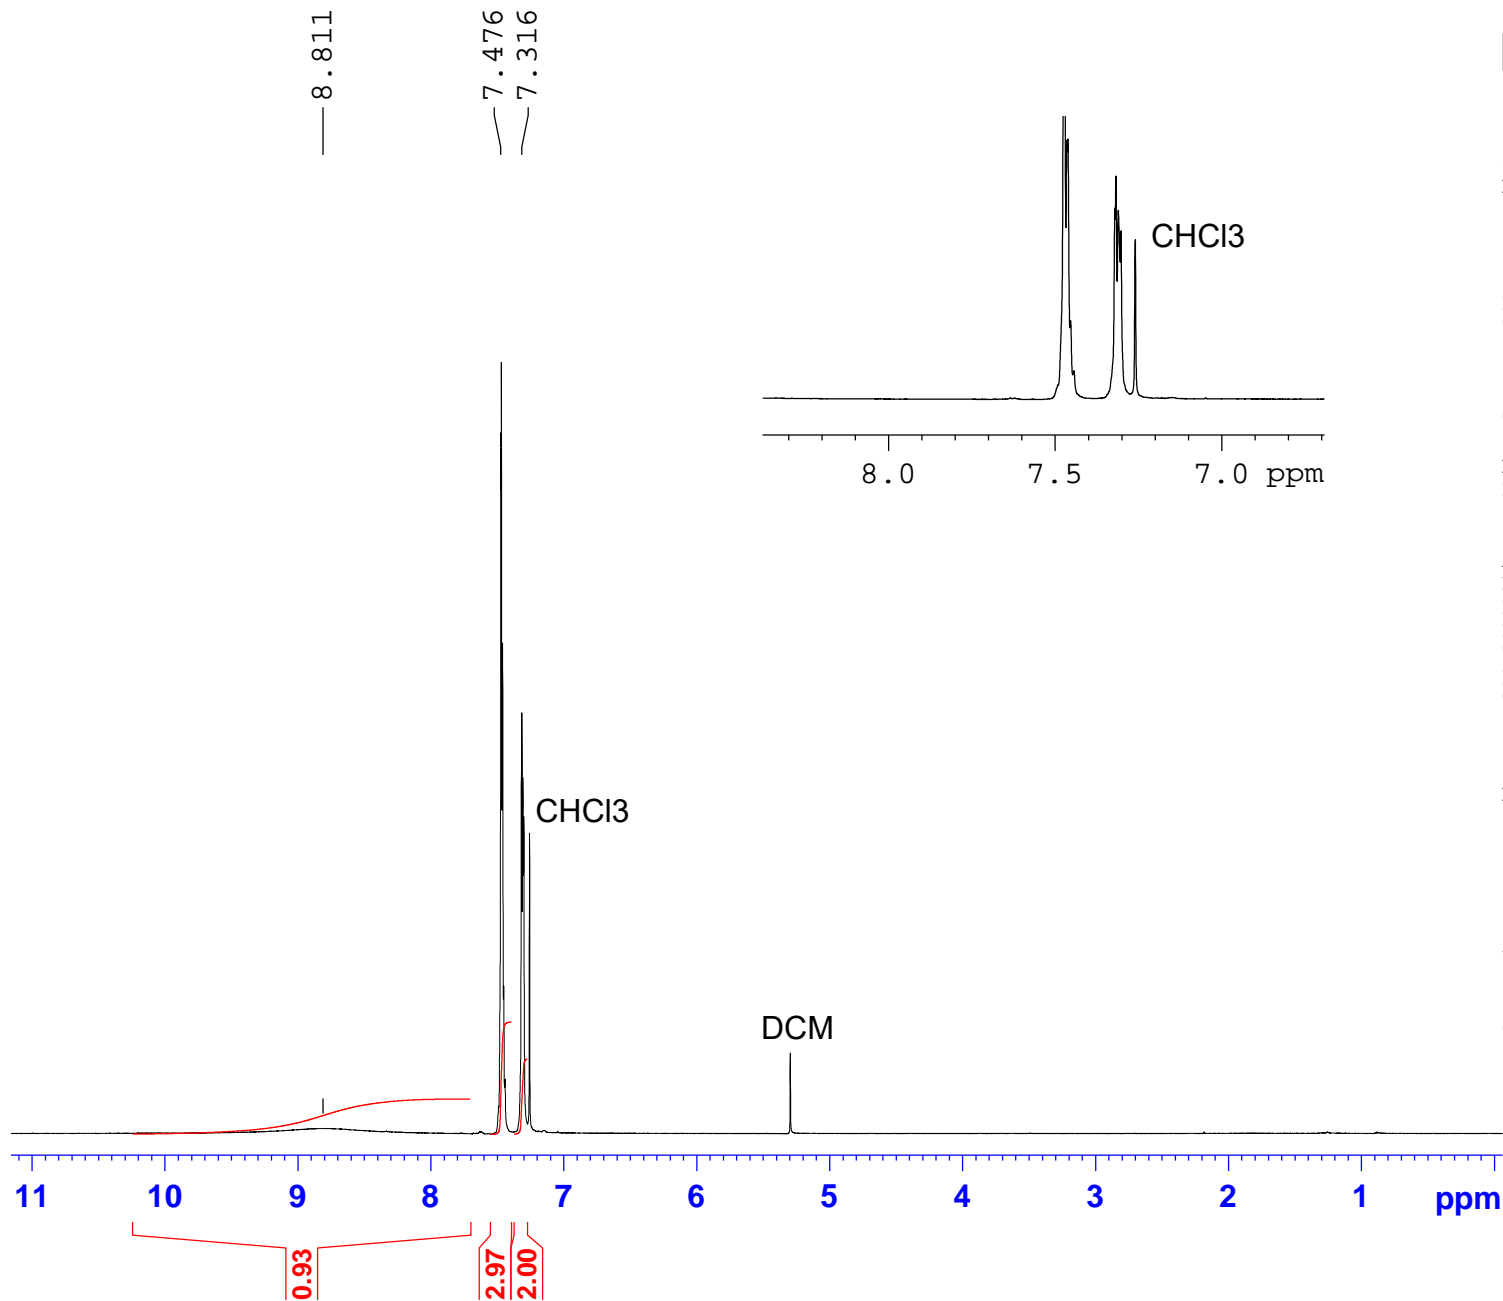

Current Data Parameters  
 NAME Andreas Kalogirou  
 EXPNO 554  
 PROCNO 1

F2 - Acquisition Parameters  
 Date\_ 20140107  
 Time 19.03  
 INSTRUM spect  
 PROBHD 5 mm PABBO BB-  
 PULPROG zg30  
 TD 65536  
 SOLVENT CDCl<sub>3</sub>  
 NS 16  
 DS 2  
 SWH 10330.578 Hz  
 FIDRES 0.157632 Hz  
 AQ 3.1719425 sec  
 RG 161  
 DW 48.400 usec  
 DE 6.50 usec  
 TE 298.2 K  
 D1 1.00000000 sec  
 TD0 1

==== CHANNEL f1 =====  
 SFO1 500.0361158 MHz  
 NUC1 1H  
 P1 11.75 usec  
 PLW1 15.41699982 W

F2 - Processing parameters  
 SI 65536  
 SF 500.0330402 MHz  
 WDW EM  
 SSB 0  
 LB 0.30 Hz  
 GB 0  
 PC 1.00

AK1074

13C NMR of 3-Bromo-4-phenylisothiazole-5-carboxylic acid (12)

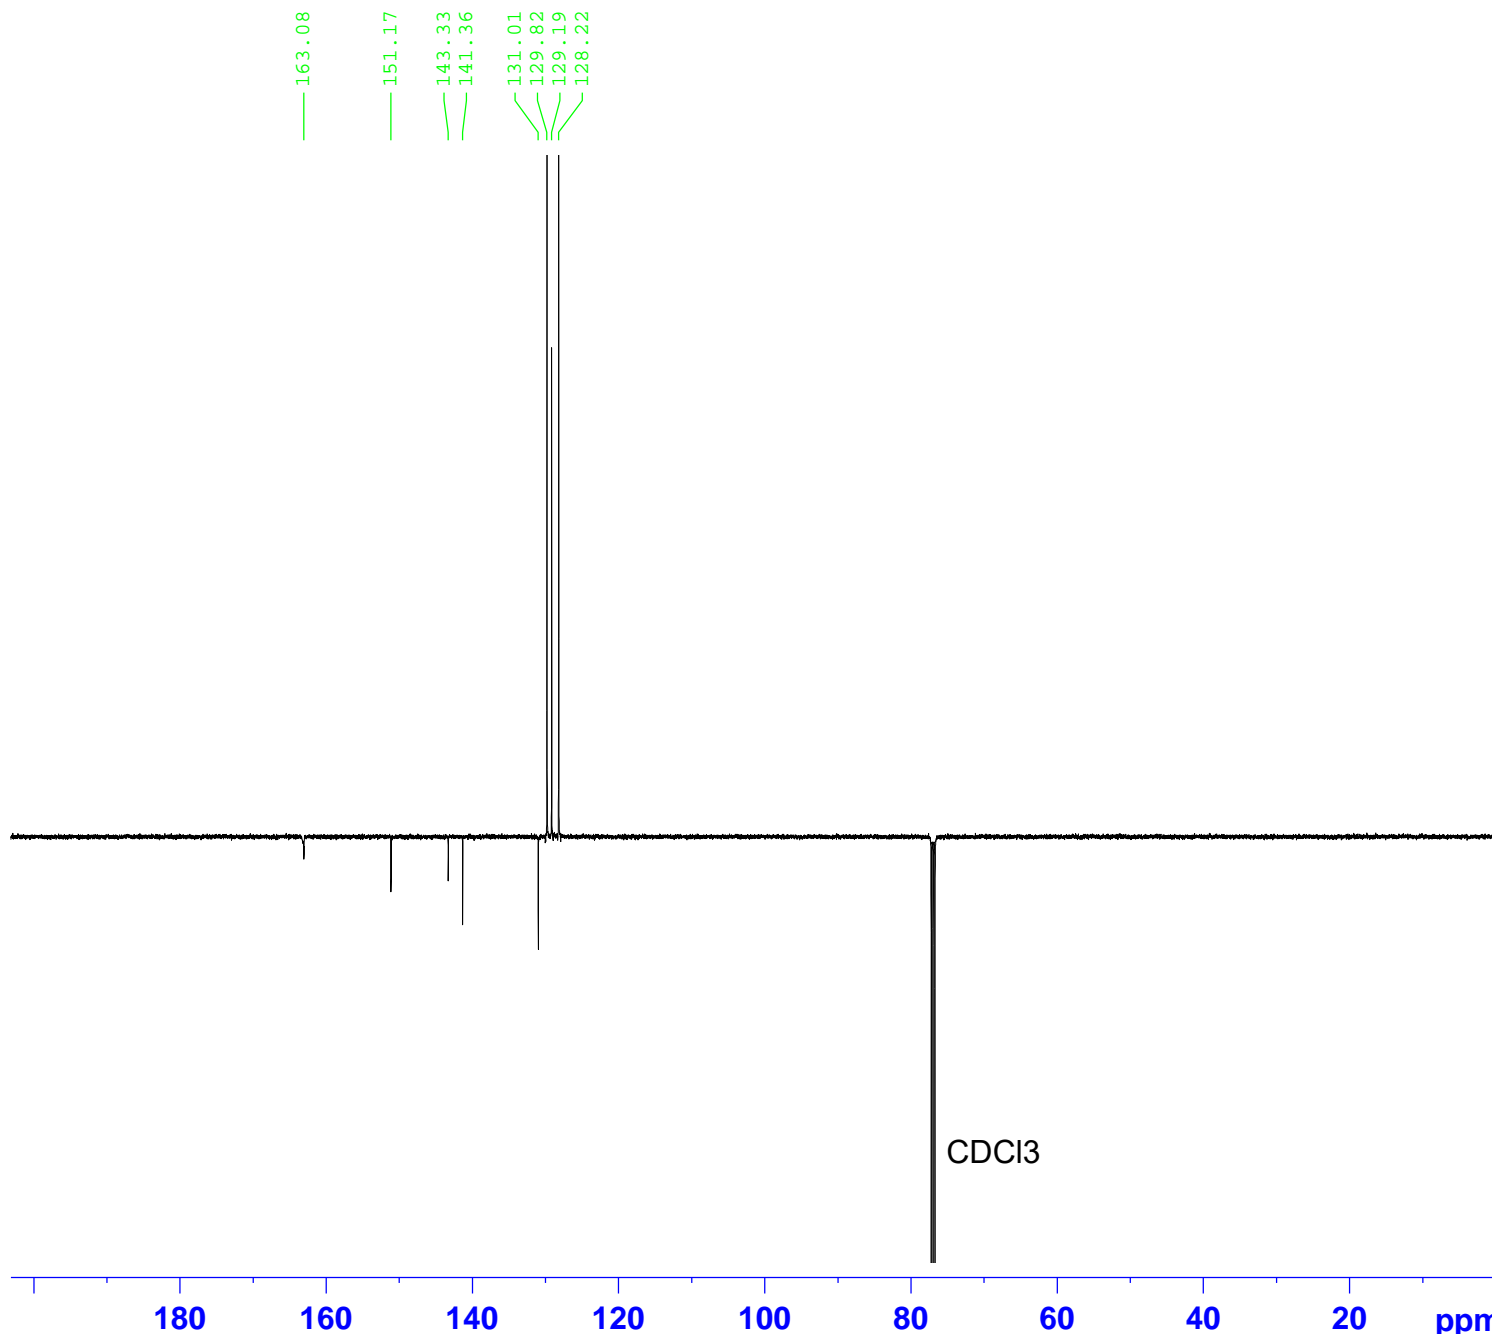

Current Data Parameters  
NAME Andreas Kalogirou  
EXPNO 555  
PROCNO 1

F2 - Acquisition Parameters  
Date\_ 20140108  
Time 9.03  
INSTRUM spect  
PROBHD 5 mm PABBO BB-  
PULPROG jmod  
TD 65536  
SOLVENT CDCl3  
NS 16000  
DS 4  
SWH 29761.904 Hz  
FIDRES 0.454131 Hz  
AQ 1.1010048 sec  
RG 2050  
DW 16.800 usec  
DE 6.50 usec  
TE 297.1 K  
CNST2 145.000000  
CNST11 1.0000000  
D1 2.0000000 sec  
D20 0.00689655 sec  
TD0 1

==== CHANNEL f1 =====  
SFO1 125.7459782 MHz  
NUC1 13C  
P1 8.70 usec  
P2 17.40 usec  
PLW1 138.0000000 W

==== CHANNEL f2 =====  
SFO2 500.0350280 MHz  
NUC2 1H  
CPDPRG[2] waltz16  
PCPD2 80.00 usec  
PLW2 15.41699982 W  
PLW12 0.33258000 W

F2 - Processing parameters  
SI 32768  
SF 125.7334070 MHz  
WDW EM  
SSB 0  
LB 1.00 Hz  
GB 0  
PC 1.40

CDCl3

AK110

1H NMR of 3-Bromoisothiazole-5-carboxylic acid (13)



Current Data Parameters  
NAME Andreas Kalogirou  
EXPNO 591  
PROCNO 1

F2 - Acquisition Parameters  
Date\_ 20140204  
Time 15.22  
INSTRUM spect  
PROBHD 5 mm PABBO BB-  
PULPROG zg30  
TD 65536  
SOLVENT CDCl3  
NS 16  
DS 2  
SWH 10330.578 Hz  
FIDRES 0.157632 Hz  
AQ 3.1719425 sec  
RG 181  
DW 48.400 usec  
DE 6.50 usec  
TE 297.8 K  
D1 1.00000000 sec  
TD0 1

==== CHANNEL f1 =====  
SFO1 500.0361158 MHz  
NUC1 1H  
P1 11.75 usec  
PLW1 15.41699982 W

F2 - Processing parameters  
SI 65536  
SF 500.0330401 MHz  
WDW EM  
SSB 0  
LB 0.30 Hz  
GB 0  
PC 1.00

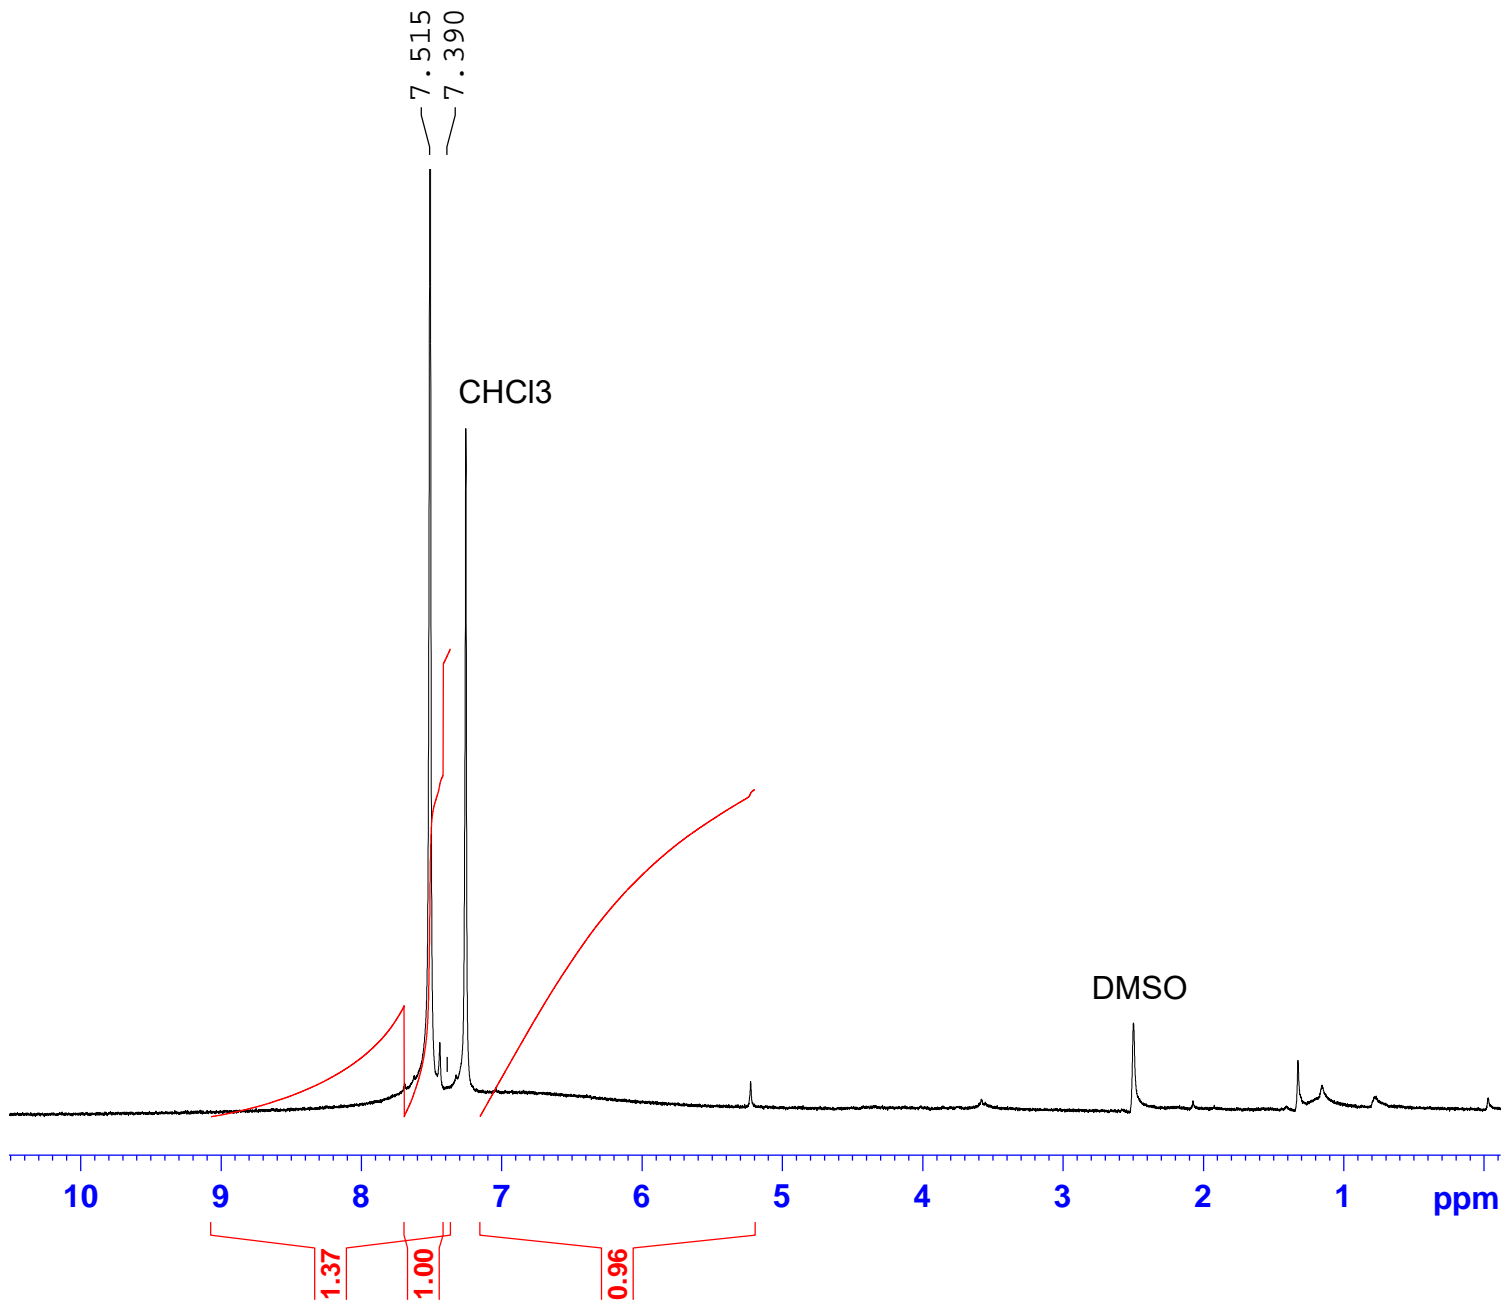

AK110

### 13C NMR of 3-Bromoisothiazole-5-carboxylic acid (13)

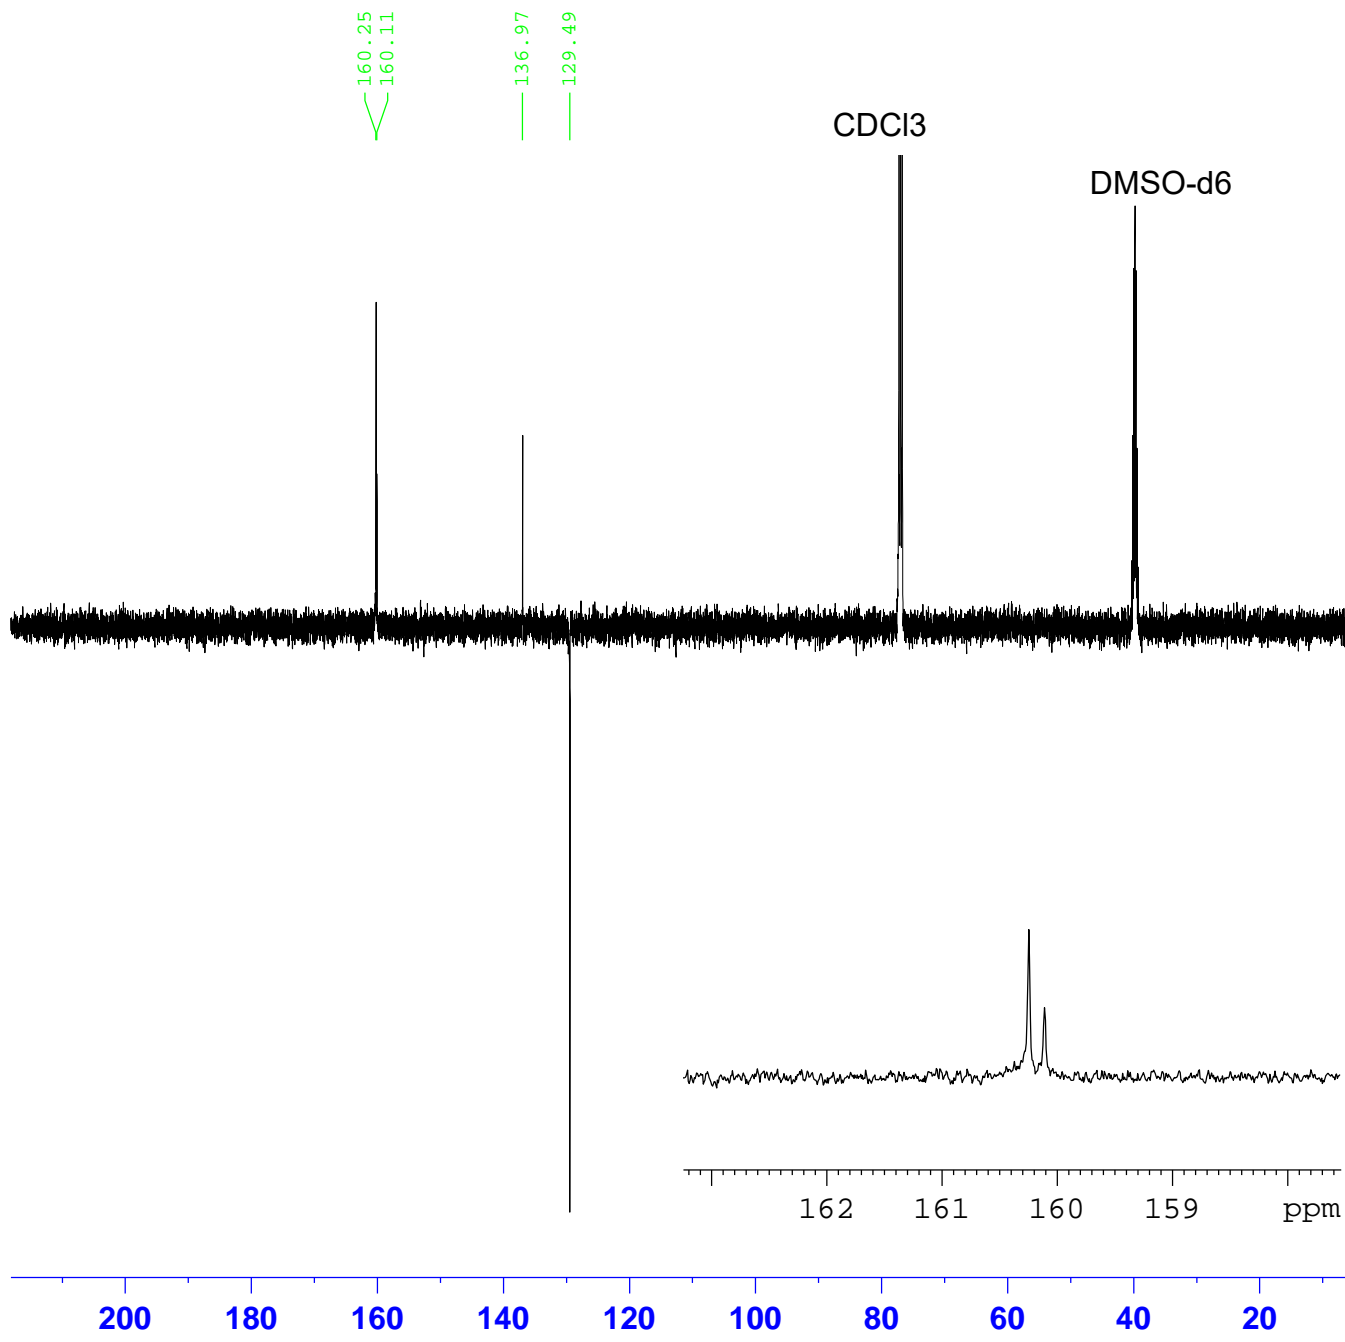

Current Data Parameters  
NAME Andreas Kalogirou  
EXPNO 592  
PROCNO 1

F2 - Acquisition Parameters  
Date\_ 20140204  
Time 18.45  
INSTRUM spect  
PROBHD 5 mm PABBO BB-  
PULPROG jmod  
TD 65536  
SOLVENT CDCl3  
NS 3877  
DS 4  
SWH 29761.904 Hz  
FIDRES 0.454131 Hz  
AQ 1.1010048 sec  
RG 2050  
DW 16.800 usec  
DE 6.50 usec  
TE 299.5 K  
CNST2 145.000000  
CNST11 1.000000  
D1 2.0000000 sec  
D20 0.00689655 sec  
TD0 1

==== CHANNEL f1 =====  
SFO1 125.7459782 MHz  
NUC1 13C  
P1 8.70 usec  
P2 17.40 usec  
PLW1 138.0000000 W

==== CHANNEL f2 =====  
SFO2 500.0350280 MHz  
NUC2 1H  
CPDPRG[2] waltz16  
PCPD2 80.00 usec  
PLW2 15.41699982 W  
PLW12 0.33258000 W

F2 - Processing parameters  
SI 32768  
SF 125.7334278 MHz  
WDW EM  
SSB 0  
LB 1.00 Hz  
GB 0  
PC 1.40

# IR of 3-Bromo-4-phenylisothiazole-5-carboxylic acid (12)

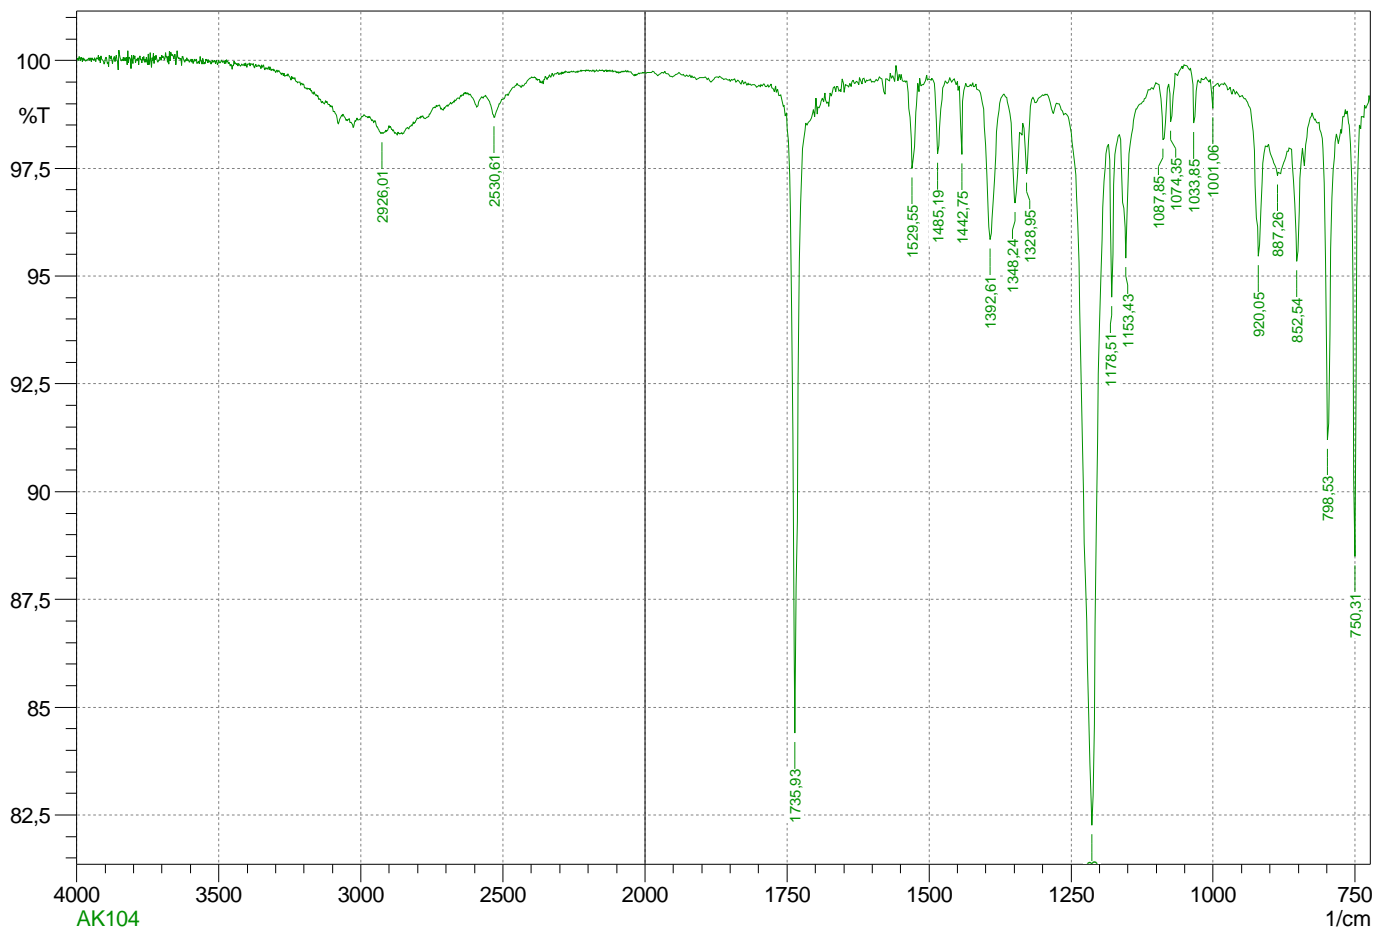

|    | Peak    | Intensity | Corr. Intensity | Base (H) | Base (L) | Area  | Corr. Area |
|----|---------|-----------|-----------------|----------|----------|-------|------------|
| 1  | 750,31  | 88,497    | 10,267          | 763,81   | 738,74   | 0,444 | 0,308      |
| 2  | 798,53  | 91,194    | 7,232           | 813,96   | 783,1    | 0,527 | 0,314      |
| 3  | 852,54  | 95,342    | 2,442           | 862,18   | 844,82   | 0,257 | 0,088      |
| 4  | 887,26  | 97,331    | 0,69            | 902,69   | 866,04   | 0,379 | 0,06       |
| 5  | 920,05  | 95,458    | 2,891           | 948,98   | 908,47   | 0,382 | 0,135      |
| 6  | 1001,06 | 98,889    | 0,646           | 1004,91  | 991,41   | 0,039 | 0,01       |
| 7  | 1033,85 | 98,557    | 1,149           | 1039,63  | 1026,13  | 0,043 | 0,025      |
| 8  | 1074,35 | 98,573    | 0,969           | 1078,21  | 1066,64  | 0,044 | 0,023      |
| 9  | 1087,85 | 98,164    | 1,307           | 1101,35  | 1078,21  | 0,098 | 0,045      |
| 10 | 1153,43 | 95,423    | 3,1             | 1165     | 1114,86  | 0,399 | 0,141      |
| 11 | 1178,51 | 94,512    | 3,601           | 1184,29  | 1166,93  | 0,228 | 0,087      |
| 12 | 1213,23 | 82,257    | 16,025          | 1257,59  | 1186,22  | 2,451 | 1,94       |
| 13 | 1328,95 | 97,378    | 1,367           | 1334,74  | 1317,38  | 0,128 | 0,04       |
| 14 | 1348,24 | 96,692    | 1,887           | 1367,53  | 1340,53  | 0,227 | 0,079      |
| 15 | 1392,61 | 95,854    | 3,418           | 1411,89  | 1369,46  | 0,381 | 0,245      |
| 16 | 1442,75 | 97,816    | 1,61            | 1446,61  | 1435,04  | 0,055 | 0,026      |
| 17 | 1485,19 | 97,841    | 1,721           | 1494,83  | 1471,69  | 0,105 | 0,061      |
| 18 | 1529,55 | 97,496    | 2               | 1539,2   | 1519,91  | 0,122 | 0,08       |
| 19 | 1735,93 | 84,406    | 14,422          | 1761,01  | 1716,65  | 0,936 | 0,714      |
| 20 | 2530,61 | 98,687    | 0,474           | 2555,68  | 2490,1   | 0,297 | 0,06       |
| 21 | 2926,01 | 98,306    | 0,156           | 2951,09  | 2912,51  | 0,272 | 0,017      |

# IR of 3-Bromoisothiazole-5-carboxylic acid (13)

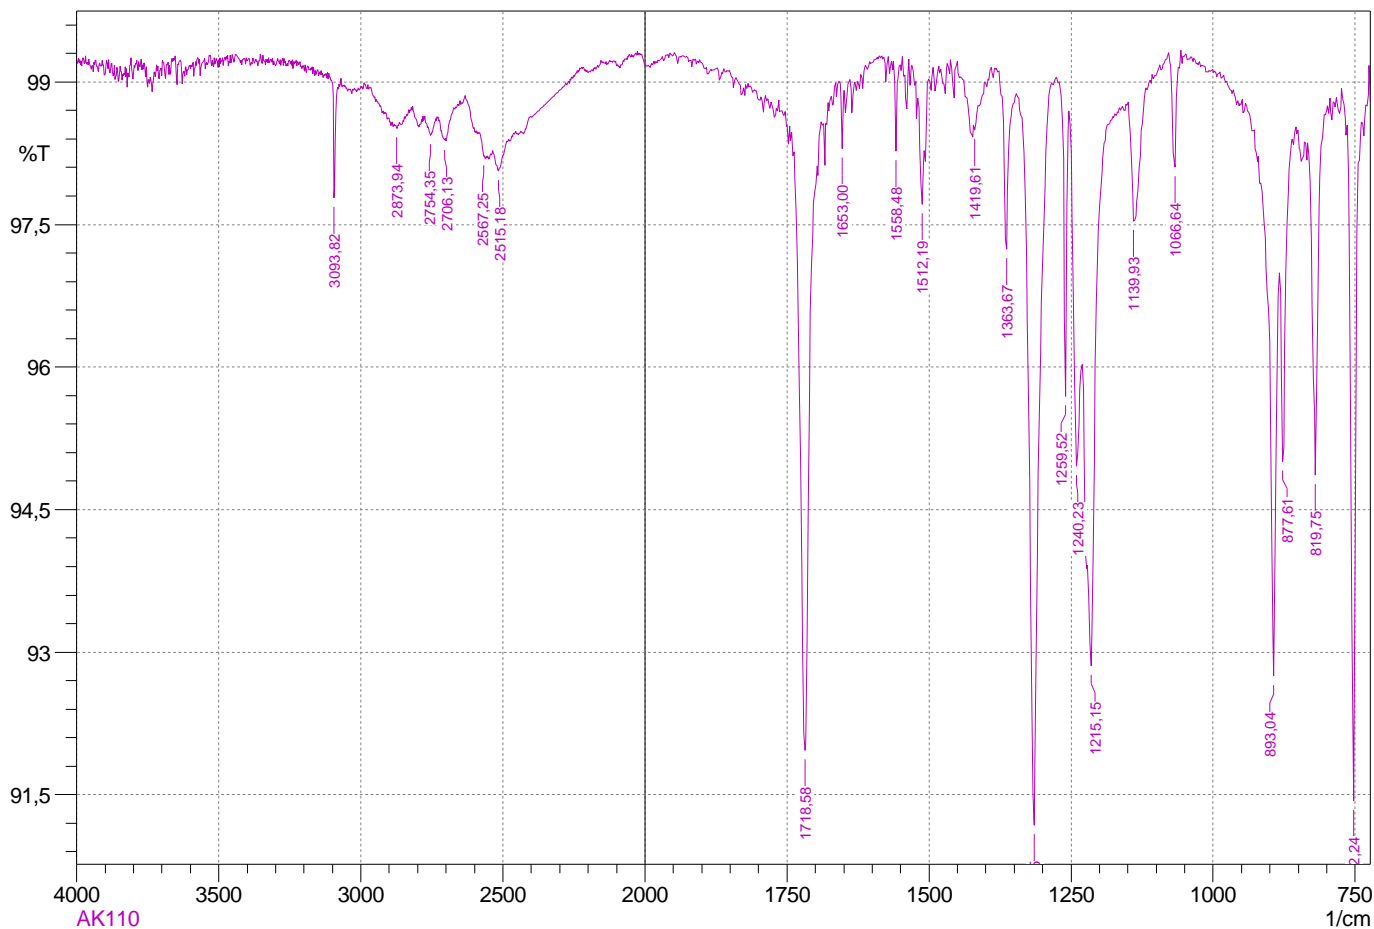

|    | Peak    | Intensity | Corr. Intensity | Base (H) | Base (L) | Area   | Corr. Area |
|----|---------|-----------|-----------------|----------|----------|--------|------------|
| 1  | 752,24  | 91,4354   | 7,1251          | 763,81   | 738,74   | 0,4436 | 0,2858     |
| 2  | 819,75  | 94,8601   | 3,6383          | 833,25   | 804,32   | 0,3565 | 0,1676     |
| 3  | 877,61  | 95,0039   | 2,338           | 883,4    | 860,25   | 0,3083 | 0,0736     |
| 4  | 893,04  | 92,7471   | 4,5651          | 920,05   | 883,4    | 0,613  | 0,2266     |
| 5  | 1066,64 | 98,1024   | 1,1022          | 1078,21  | 1060,85  | 0,0938 | 0,0356     |
| 6  | 1139,93 | 97,5342   | 1,3017          | 1149,57  | 1118,71  | 0,2439 | 0,0906     |
| 7  | 1215,15 | 92,8591   | 1,6731          | 1220,94  | 1176,58  | 0,6412 | -0,0955    |
| 8  | 1240,23 | 94,9565   | 2,1813          | 1253,73  | 1230,58  | 0,3693 | 0,0994     |
| 9  | 1259,52 | 95,6905   | 3,105           | 1271,09  | 1253,73  | 0,1542 | 0,0666     |
| 10 | 1315,45 | 91,1764   | 7,757           | 1346,31  | 1284,59  | 0,9606 | 0,6731     |
| 11 | 1363,67 | 97,2426   | 1,7665          | 1377,17  | 1346,31  | 0,2075 | 0,0721     |
| 12 | 1419,61 | 98,4964   | 0,1011          | 1421,54  | 1413,82  | 0,0475 | 0,0019     |
| 13 | 1512,19 | 97,7103   | 0,7523          | 1519,91  | 1508,33  | 0,0896 | 0,0164     |
| 14 | 1558,48 | 98,2702   | 0,938           | 1562,34  | 1550,77  | 0,0533 | 0,013      |
| 15 | 1653    | 98,2968   | 0,6522          | 1658,78  | 1649,14  | 0,0512 | 0,0073     |
| 16 | 1718,58 | 91,9678   | 6,2265          | 1737,86  | 1697,36  | 0,781  | 0,4599     |
| 17 | 2515,18 | 98,0631   | 0,1788          | 2532,54  | 2499,75  | 0,2671 | 0,0146     |
| 18 | 2567,25 | 98,2205   | 0,03            | 2582,68  | 2565,33  | 0,1256 | -0,0001    |
| 19 | 2706,13 | 98,3824   | 0,0591          | 2723,49  | 2702,27  | 0,1437 | 0,0049     |
| 20 | 2754,35 | 98,442    | 0,0475          | 2763,99  | 2750,49  | 0,0902 | 0,0016     |
| 21 | 2873,94 | 98,5128   | 0,0318          | 2875,86  | 2868,15  | 0,0496 | 0,0006     |
| 22 | 3093,82 | 97,783    | 1,2141          | 3107,32  | 3080,32  | 0,154  | 0,0358     |
