# Supplementary material
Source: MDPI journal article supplement (https://www.mdpi.com/search?q=molbank-2023-M1557)
Supplement: s002 [file molbank-2023-M1557-s002-mod.mol]

KingDraw KingDraw.mol
  corina  01282307483D 1   1.00000     0.00000 
CORINA 4.4.0 0026  12.08.2021
 20 20  0  0  0  0  0  0  0  0999 V2000
   -0.6630    5.5237    0.0366 N   0  0  0  0  0  0  0  0  0  0  0  0
    0.1733    4.2033    0.0319 S   0  0  0  0  0  0  0  0  0  0  0  0
   -3.7894    3.4386    0.0379 R   0  0  0  0  0  0  0  0  0  0  0  0
   -3.2206    6.6379    0.0538 Br  0  0  0  0  0  0  0  0  0  0  0  0
   -0.0111    0.9658    0.0074 N   0  0  0  0  0  0  0  0  0  0  0  0
   -1.1873    1.6238    0.0165 C   0  0  0  0  0  0  0  0  0  0  0  0
   -2.2323    1.0014    0.0181 O   0  0  0  0  0  0  0  0  0  0  0  0
   -1.2073    3.0947    0.0246 C   0  0  0  0  0  0  0  0  0  0  0  0
   -2.3093    3.9315    0.0344 C   0  0  0  0  0  0  0  0  0  0  0  0
   -1.9309    5.2551    0.0406 C   0  0  0  0  0  0  0  0  0  0  0  0
    6.7626   15.1094    5.1070 N   0  0  0  0  0  0  0  0  0  0  0  0
    8.2200   15.6740    5.0962 S   0  0  0  0  0  0  0  0  0  0  0  0
    8.2010   11.6379    5.0747 R   0  0  0  0  0  0  0  0  0  0  0  0
    5.1733   12.8165    5.1093 Br  0  0  0  0  0  0  0  0  0  0  0  0
   11.3590   14.8663    5.0615 O   0  0  0  0  0  0  0  0  0  0  0  0
   10.4852   13.8396    5.0643 C   0  0  0  0  0  0  0  0  0  0  0  0
   10.8929   12.6945    5.0538 O   0  0  0  0  0  0  0  0  0  0  0  0
    9.0400   14.1048    5.0799 C   0  0  0  0  0  0  0  0  0  0  0  0
    8.0048   13.1855    5.0848 C   0  0  0  0  0  0  0  0  0  0  0  0
    6.7801   13.8134    5.0999 C   0  0  0  0  0  0  0  0  0  0  0  0
  1  2  1  0
  2  8  1  0
  9 10  1  0
  9  3  1  0
 10  4  1  0
  8  6  1  0
  6  5  1  0
  6  7  2  0
  8  9  2  0
 10  1  2  0
 11 12  1  0
 12 18  1  0
 19 20  1  0
 19 13  1  0
 20 14  1  0
 18 16  1  0
 16 15  1  0
 16 17  2  0
 18 19  2  0
 20 11  2  0
M  END
$$$$
