# Supplementary material
Source: MDPI journal article supplement (https://www.mdpi.com/search?q=molbank-2023-M1557)
Supplement: s002 [file molbank-2023-M1557-s002.mol]

KingDraw KingDraw.mol
KingDraw2D

 20 20  0  0  0  0  0  0  0  0999 V2000
    6.9898   -2.7846    0.0000 N   0  0  0  0  0  0  0  0  0  0  0  0
    6.3588   -3.2431    0.0000 S   0  0  0  0  0  0  0  0  0  0  0  0
    5.5102   -1.4118    0.0000 R   0  0  0  0  0  0  0  0  0  0  0  0
    7.2072   -1.4117    0.0000 Br  0  0  0  0  0  0  0  0  0  0  0  0
    4.4062   -2.5038    0.0000 N   0  0  0  0  0  0  0  0  0  0  0  0
    4.9859   -3.0257    0.0000 C   0  0  0  0  0  0  0  0  0  0  0  0
    4.8242   -3.7887    0.0000 O   0  0  0  0  0  0  0  0  0  0  0  0
    5.7277   -2.7846    0.0000 C   0  0  0  0  0  0  0  0  0  0  0  0
    5.9688   -2.0428    0.0000 C   0  0  0  0  0  0  0  0  0  0  0  0
    6.7488   -2.0428    0.0000 C   0  0  0  0  0  0  0  0  0  0  0  0
   11.2937   -2.7846    0.0000 N   0  0  0  0  0  0  0  0  0  0  0  0
   10.6627   -3.2431    0.0000 S   0  0  0  0  0  0  0  0  0  0  0  0
    9.8141   -1.4118    0.0000 R   0  0  0  0  0  0  0  0  0  0  0  0
   11.5111   -1.4117    0.0000 Br  0  0  0  0  0  0  0  0  0  0  0  0
    8.7101   -2.5038    0.0000 O   0  0  0  0  0  0  0  0  0  0  0  0
    9.2898   -3.0257    0.0000 C   0  0  0  0  0  0  0  0  0  0  0  0
    9.1280   -3.7887    0.0000 O   0  0  0  0  0  0  0  0  0  0  0  0
   10.0316   -2.7846    0.0000 C   0  0  0  0  0  0  0  0  0  0  0  0
   10.2727   -2.0428    0.0000 C   0  0  0  0  0  0  0  0  0  0  0  0
   11.0527   -2.0428    0.0000 C   0  0  0  0  0  0  0  0  0  0  0  0
  1  2  1  0
  2  8  1  0
  9 10  1  0
  9  3  1  0
 10  4  1  0
  8  6  1  0
  6  5  1  0
  6  7  2  0
  8  9  2  0
 10  1  2  0
 11 12  1  0
 12 18  1  0
 19 20  1  0
 19 13  1  0
 20 14  1  0
 18 16  1  0
 16 15  1  0
 16 17  2  0
 18 19  2  0
 20 11  2  0
M  END
